# Supplementary material
Source: publisher figshare collection journal article supplement (https://acs.figshare.com/ndownloader/files/4494337)
Supplement: Supplementary file 1 [file 4494337]

## Supporting Information

### Theoretical Investigation of *N*-Nitrosodimethylamine Formation from Nitrosation of Trimethylamine

*Zhi Sun, Yong Dong Liu<sup>\*</sup>, Ru Gang Zhong*

#### Content

**Table S1.** Energies (*E*, 0K / 298K), Enthalpies (*H*, at 298K and 1 atm), and Gibbs Free Energies (*G*, at 298K and 1 atm) as well as the Lowest Harmonic Vibrational Frequency (LHVF) of each Stationary Point involved in Scheme 1 at the CBS-QB3 level in the Gas Phase

**Table S2.** Energies (*E*<sub>sol</sub>) of each Stationary Point involved in Scheme 1 in Aqueous Solution at the CPCM-CCSD(T)/6-311+G(d,p)//B3LYP/CBSB7 level

**Table S3.** Energies (*E*, 0K / 298K), Enthalpies (*H*, at 298K and 1 atm), and Gibbs Free Energies (*G*, at 298K and 1 atm) as well as the Lowest Harmonic Vibrational Frequency (LHVF) of each Stationary Point involved in Scheme 2 at the CBS-QB3 level in the Gas Phase

**Table S4.** Energies (*E*<sub>sol</sub>) of each Stationary Point involved in Scheme 2 in Aqueous Solution at the CPCM-CCSD(T)/6-311+G(d,p)//B3LYP/CBSB7 level

**Table S5.** Energies (*E*, 0K / 298K), Enthalpies (*H*, at 298K and 1 atm), and Gibbs Free Energies (*G*, at 298K and 1 atm) as well as the Lowest Harmonic Vibrational Frequency (LHVF) of each Stationary Point involved in Scheme 3 at the CBS-QB3 level in the Gas Phase

**Table S6.** Energies (*E*<sub>sol</sub>) of each Stationary Point involved in Scheme 3 in Aqueous Solution at the CPCM-CCSD(T)/6-311+G(d,p)//B3LYP/CBSB7 level

**Table S7.** Energies (*E*, 0K / 298K), Enthalpies (*H*, at 298K and 1 atm), and Gibbs Free Energies (*G*, at 298K and 1 atm) as well as the Lowest Harmonic Vibrational Frequency (LHVF) of each Stationary Point involved in Scheme 4 at the CBS-QB3

---

<sup>\*</sup> Corresponding author. Fax: +86-10-6739-2001. E-mail: ydliu@bjut.edu.cn.

level in the Gas Phase

**Table S8.** Energies ( $E_{\text{sol}}$ ) of each Stationary Point involved in Scheme 4 in Aqueous Solution at the CPCM-CCSD(T)/6-311+G(d,p)//B3LYP/CBSB7 level

**Table S9.** Energies ( $E$ , 0K / 298K), Enthalpies ( $H$ , at 298K and 1 atm), and Gibbs Free Energies ( $G$ , at 298K and 1 atm) as well as the Lowest Harmonic Vibrational Frequency (LHVF) of each Stationary Point involved in Scheme 5 at the CBS-QB3 level in the Gas Phase

**Table S10.** Energies ( $E_{\text{sol}}$ ) of each Stationary Point involved in Scheme 5 in Aqueous Solution at the CPCM-CCSD(T)/6-311+G(d,p)//B3LYP/CBSB7 level

**Table S11.** Energies ( $E$ , 0K / 298K), Enthalpies ( $H$ , at 298K and 1 atm), and Gibbs Free Energies ( $G$ , at 298K and 1 atm) as well as the Lowest Harmonic Vibrational Frequency (LHVF) of each Stationary Point involved in Scheme 6 at the CBS-QB3 level in the Gas Phase

**Table S12.** Energies ( $E_{\text{sol}}$ ) of each Stationary Point involved in Scheme 6 in Aqueous Solution at the CPCM-CCSD(T)/6-311+G(d,p)//B3LYP/CBSB7 level

**Table S13.** Energies ( $E$ , 0K / 298K), Enthalpies ( $H$ , at 298K and 1 atm), and Gibbs Free Energies ( $G$ , at 298K and 1 atm) as well as the Lowest Harmonic Vibrational Frequency (LHVF) of each Stationary Point involved in the Hydrolysis Mechanisms involving TS2-A' and TS2-B' at the PBE1W/CBSB7 level in the Gas Phase

**Table S14.** Energies ( $E_{\text{sol}}$ ) of each Stationary Point involved in the Hydrolysis Mechanisms involving TS2-A' and TS2-B' in Aqueous Solution at the CPCM-CCSD(T)/6-311+G(d,p)//PBE1W/CBSB7 level

**Table S1** Energies (E, 0K / 298K), Enthalpies (H, at 298K and 1 atm), and Gibbs Free Energies (G, at 298K and 1 atm) as well as the Lowest Harmonic Vibrational Frequency (LHVF) of each Stationary Point involved in Scheme 1 at the CBS-QB3 level in the Gas Phase <sup>a</sup>

| Species         | E <sup>(0K)</sup> <sup>b</sup> | E <sup>(298K)</sup> | H <sup>(298K)</sup> | G <sup>(298K)</sup> | LHVF   |
|-----------------|--------------------------------|---------------------|---------------------|---------------------|--------|
| TMA             | -174.106383                    | -174.100885         | -174.099940         | -174.132700         | 252.3  |
| NO <sup>+</sup> | -129.405990                    | -129.403629         | -129.402685         | -129.425172         | 2494.4 |
| CR1-A           | -303.605823                    | -303.597545         | -303.596600         | -303.638074         | 43.9   |
| TS1-A           | -303.518428                    | -303.509877         | -303.508933         | -303.551590         | 137.7i |
| CP1-A           | -303.529050                    | -303.519726         | -303.518782         | -303.564002         | 55.7   |
| NOH             | -130.255689                    | -130.252837         | -130.251893         | -130.276946         | 1273.3 |
| Iminium Ion     | -173.259908                    | -173.254611         | -173.253667         | -173.286719         | 128.5  |

<sup>a</sup> Energies, Enthalpies, and Gibbs Free Energies in hartree, lowest harmonic vibrational frequency in cm<sup>-1</sup>; CR, TS, and CP correspond to Reactant Complex, Transition State, and Product Complex, respectively.

<sup>b</sup> Energies at 0K was corrected with Zero Point Energies (ZPE).

**Table S2** Energies (E<sub>sol</sub>) of each Stationary Point involved in Scheme 1 in Aqueous Solution at the CPCM-CCSD(T)/6-311+G(d,p)//B3LYP/CBSB7 level

| Species         | E <sub>sol</sub> (hartree) |
|-----------------|----------------------------|
| TMA             | -174.047921                |
| NO <sup>+</sup> | -129.457976                |
| CR1-A           | -303.538799                |
| TS1-A           | -303.453356                |
| CP1-A           | -303.461817                |
| NOH             | -130.171622                |
| Iminium Ion     | -173.286665                |

**Table S3** Energies (E, 0K / 298K), Enthalpies (H, at 298K and 1 atm), and Gibbs Free Energies (G, at 298K and 1 atm) as well as the Lowest Harmonic Vibrational Frequency (LHVF) of each Stationary Point involved in Scheme 2 at the CBS-QB3 level in the Gas Phase <sup>a</sup>

| Species          | E <sup>(0K)</sup> <sup>b</sup> | E <sup>(298K)</sup> | H <sup>(298K)</sup> | G <sup>(298K)</sup> | LHVF   |
|------------------|--------------------------------|---------------------|---------------------|---------------------|--------|
| TMA <sup>+</sup> | -173.817304                    | -173.810822         | -173.809878         | -173.846557         | 78.1   |
| NO <sub>2</sub>  | -204.852546                    | -204.849612         | -204.848668         | -204.87656          | 766.7  |
| CR1-B            | -378.714002                    | -378.702828         | -378.701884         | -378.755062         | 15.4   |
| TS1-B            | -378.642342                    | -378.632746         | -378.631802         | -378.679586         | 834.7i |
| CP1-B            | -378.746274                    | -378.735957         | -378.735013         | -378.785389         | 10.8   |
| HNO <sub>2</sub> | -205.475014                    | -205.471773         | -205.470829         | -205.499020         | 588.6  |
| Iminium Ion      | -173.259908                    | -173.254611         | -173.253667         | -173.286719         | 128.5  |

<sup>a</sup> Energies, Enthalpies, and Gibbs Free Energies in hartree, lowest harmonic vibrational frequency in cm<sup>-1</sup>; CR, TS, and CP correspond to Reactant Complex, Transition State, and Product Complex, respectively.

<sup>b</sup> Energies at 0K was corrected with Zero Point Energies (ZPE).

**Table S4** Energies (E<sub>sol</sub>) of each Stationary Point involved in Scheme 2 in Aqueous Solution at the CPCM-CCSD(T)/6-311+G(d,p)//B3LYP/CBSB7 level

| Species          | E <sub>sol</sub> (hartree) |
|------------------|----------------------------|
| TMA <sup>+</sup> | -173.853720                |
| NO <sub>2</sub>  | -204.686334                |
| CR1-B            | -378.462713                |
| TS1-B            | -378.477870                |
| CP1-B            | -378.613557                |
| HNO <sub>2</sub> | -205.325480                |
| Iminium Ion      | -173.286665                |

**Table S5** Energies (E, 0K / 298K), Enthalpies (H, at 298K and 1 atm), and Gibbs Free Energies (G, at 298K and 1 atm) as well as the Lowest Harmonic Vibrational Frequency (LHVF) of each Stationary Point involved in Scheme 3 at the CBS-QB3 level in the Gas Phase <sup>a</sup>

| Species          | E <sup>(0K)</sup> <sup>b</sup> | E <sup>(298K)</sup> | H <sup>(298K)</sup> | G <sup>(298K)</sup> | LHVF    |
|------------------|--------------------------------|---------------------|---------------------|---------------------|---------|
| Iminium Ion      | -173.259908                    | -173.254611         | -173.253667         | -173.286719         | 128.5   |
| H <sub>2</sub> O | -76.337482                     | -76.334647          | -76.333703          | -76.355129          | 1637.9  |
| CR2-A            | -249.612255                    | -249.602993         | -249.602049         | -249.646644         | 49.7    |
| TS2-A            | -249.548175                    | -249.541775         | -249.540831         | -249.577565         | 1374.1i |
| CP2-A            | -249.608532                    | -249.601442         | -249.600498         | -249.639165         | 58.1    |

<sup>a</sup> Energies, Enthalpies, and Gibbs Free Energies in hartree; CR, TS, and CP correspond to Reactant Complex, Transition State, and Product Complex, respectively.

<sup>b</sup> Energies at 0K was corrected with Zero Point Energies (ZPE).

**Table S6** Energies (E<sub>sol</sub>) of each Stationary Point involved in Scheme 3 in Aqueous Solution at the CPCM-CCSD(T)/6-311+G(d,p)//B3LYP/CBSB7 level

| Species          | E <sub>sol</sub> (hartree) |
|------------------|----------------------------|
| Iminium Ion      | -173.286665                |
| H <sub>2</sub> O | -76.297923                 |
| CR2-A            | -249.589700                |
| TS2-A            | -249.537370                |
| CP2-A            | -249.607568                |

**Table S7** Energies (E, 0K / 298K), Enthalpies (H, at 298K and 1 atm), and Gibbs Free Energies (G, at 298K and 1 atm) as well as the Lowest Harmonic Vibrational Frequency (LHVF) of each Stationary Point involved in Scheme 4 at the CBS-QB3 level in the Gas Phase <sup>a</sup>

| Species          | E <sup>(0K)</sup> <sup>b</sup> | E <sup>(298K)</sup> | H <sup>(298K)</sup> | G <sup>(298K)</sup> | LHVF   |
|------------------|--------------------------------|---------------------|---------------------|---------------------|--------|
| Iminium Ion      | -173.259908                    | -173.254611         | -173.253667         | -173.286719         | 128.5  |
| H <sub>2</sub> O | -76.337482                     | -76.334647          | -76.333703          | -76.355129          | 1637.9 |
| CR2-B            | -325.962657                    | -325.951055         | -325.950111         | -325.999951         | 33.9   |
| TS2-B            | -325.925357                    | -325.916748         | -325.915804         | -325.957707         | 276.5i |
| CP2-B            | -325.969765                    | -325.959492         | -325.958548         | -326.004720         | 50.9   |

<sup>a</sup> Energies, Enthalpies, and Gibbs Free Energies in hartree; CR, TS, and CP correspond to Reactant Complex, Transition State, and Product Complex, respectively.

<sup>b</sup> Energies at 0K was corrected with Zero Point Energies (ZPE).

**Table S8** Energies (E<sub>sol</sub>) of each Stationary Point involved in Scheme 4 in Aqueous Solution at the CPCM-CCSD(T)/6-311+G(d,p)//B3LYP/CBSB7 level

| Species          | E <sub>sol</sub> (hartree) |
|------------------|----------------------------|
| Iminium Ion      | -173.286665                |
| H <sub>2</sub> O | -76.297923                 |
| CR2-B            | -325.893402                |
| TS2-B            | -325.869018                |
| CP2-B            | -325.913364                |

**Table S9** Energies (E, 0K / 298K), Enthalpies (H, at 298K and 1 atm), and Gibbs Free Energies (G, at 298K and 1 atm) as well as the Lowest Harmonic Vibrational Frequency (LHVF) of each Stationary Point involved in Scheme 5 at the CBS-QB3 level in the Gas Phase <sup>a</sup>

| Species                      | E <sup>(0K)</sup> <sup>b</sup> | E <sup>(298K)</sup> | H <sup>(298K)</sup> | G <sup>(298K)</sup> | LHVF   |
|------------------------------|--------------------------------|---------------------|---------------------|---------------------|--------|
| Iminium Ion                  | -173.259908                    | -173.254611         | -173.253667         | -173.286719         | 128.5  |
| NO <sub>2</sub> <sup>-</sup> | -204.936076                    | -204.933143         | -204.932199         | -204.959105         | 803.2  |
| PR3                          | -378.400254                    | -378.391976         | -378.391031         | -378.433198         | 69.7   |
| TS3                          | -378.355724                    | -378.347317         | -378.346373         | -378.388084         | 383.5i |
| CP3                          | -378.408432                    | -378.398086         | -378.397142         | -378.445556         | 29.7   |
| NDMA                         | -264.058460                    | -264.052232         | -264.051288         | -264.088541         | 34.6   |
| CH <sub>2</sub> O            | -114.344172                    | -114.341303         | -114.340359         | -114.365173         | 1202.1 |

<sup>a</sup> Energies, Enthalpies, and Gibbs Free Energies in hartree; PR, TS, and CP correspond to Prereactant, Transition State, and Product Complex, respectively.

<sup>b</sup> Energies at 0K was corrected with Zero Point Energies (ZPE).

**Table S10** Energies (E<sub>sol</sub>) of each Stationary Point involved in Scheme 5 in Aqueous Solution at the CPCM-CCSD(T)/6-311+G(d,p)//B3LYP/CBSB7 level

| Species                      | E <sub>sol</sub> (hartree) |
|------------------------------|----------------------------|
| Iminium Ion                  | -173.286665                |
| NO <sub>2</sub> <sup>-</sup> | -204.864008                |
| PR3                          | -378.174904                |
| TS3                          | -378.134346                |
| CP3                          | -378.180870                |
| NDMA                         | -263.906926                |
| CH <sub>2</sub> O            | -114.271329                |

**Table S11** Energies (E, 0K / 298K), Enthalpies (H, at 298K and 1 atm), and Gibbs Free Energies (G, at 298K and 1 atm) as well as the Lowest Harmonic Vibrational Frequency (LHVF) of each Stationary Point involved in Scheme 6 at the CBS-QB3 level in the Gas Phase <sup>a</sup>

| Species                       | E <sup>(0K)</sup> <sup>b</sup> | E <sup>(298K)</sup> | H <sup>(298K)</sup> | G <sup>(298K)</sup> | LHVF   |
|-------------------------------|--------------------------------|---------------------|---------------------|---------------------|--------|
| Iminium Ion                   | -173.259908                    | -173.254611         | -173.253667         | -173.286719         | 128.5  |
| N <sub>2</sub> O <sub>3</sub> | -334.613669                    | -334.608732         | -334.607788         | -334.641782         | 149.5  |
| CR4                           | -507.890622                    | -507.878283         | -507.877339         | -507.932367         | 12.8   |
| TS4-1                         | -507.844215                    | -507.833455         | -507.832510         | -507.881416         | 345.5i |
| IM                            | -507.890985                    | -507.879756         | -507.878812         | -507.928094         | 51.4   |
| TS4-2                         | -507.866580                    | -507.855554         | -507.854610         | -507.903213         | 211.9i |
| CP4                           | -507.896296                    | -507.883458         | -507.882513         | -507.937756         | 27.3   |

<sup>a</sup> Energies, Enthalpies, and Gibbs Free Energies in hartree; CR, TS, and CP correspond to Reactant Complex, Transition State, and Product Complex, respectively.

<sup>b</sup> Energies at 0K was corrected with Zero Point Energies (ZPE).

**Table S12** Energies (E<sub>sol</sub>) of each Stationary Point involved in Scheme 6 in Aqueous Solution at the CPCM-CCSD(T)/6-311+G(d,p)//B3LYP/CBSB7 level

| Species                       | E <sub>sol</sub> (hartree) |
|-------------------------------|----------------------------|
| Iminium Ion                   | -173.286665                |
| N <sub>2</sub> O <sub>3</sub> | -334.350510                |
| CR4                           | -507.640108                |
| TS4-1                         | -507.613084                |
| IM                            | -507.654014                |
| TS4-2                         | -507.621957                |
| CP4                           | -507.644638                |



**Table S13** Energies (E, 0K / 298K), Enthalpies (H, at 298K and 1 atm), and Gibbs Free Energies (G, at 298K and 1 atm) as well as the Lowest Harmonic Vibrational Frequency (LHVF) of each Stationary Point in the Hydrolysis Mechanisms involving TS2-A' and TS2-B' at the PBE1W/CBSB7 level in the Gas Phase <sup>a</sup>

| Species          | E <sup>(0K)</sup> <sup>b</sup> | E <sup>(298K)</sup> | H <sup>(298K)</sup> | G <sup>(298K)</sup> | LHVF    |
|------------------|--------------------------------|---------------------|---------------------|---------------------|---------|
| Iminium Ion      | -173.317245                    | -173.311917         | -173.310973         | -173.344057         | 128.7   |
| H <sub>2</sub> O | -76.339568                     | -76.336732          | -76.335788          | -76.357241          | 1605.4  |
| CR2-A'           | -249.678360                    | -249.669825         | -249.668881         | -249.710494         | 59.7    |
| TS2-A'           | -249.554414                    | -249.547602         | -249.546657         | -249.583634         | 1268.4i |
| CP2-A'           | -249.625403                    | -249.618722         | -249.617778         | -249.654357         | 185.9   |
| CR2-B'           | -326.038031                    | -326.026500         | -326.025555         | -326.075100         | 34.8    |
| TS2-B'           | -325.937748                    | -325.929397         | -325.928453         | -325.969490         | 1015.6i |
| CP2-B'           | -325.985864                    | -325.975878         | -325.974933         | -326.019444         | 58.7    |

<sup>a</sup> Energies, Enthalpies, and Gibbs Free Energies in hartree; CR, TS, and CP correspond to Reactant Complex, Transition State, and Product Complex, respectively.

<sup>b</sup> Energies at 0K was corrected with Zero Point Energies (ZPE).

**Table S14** Energies (E<sub>sol</sub>) of each Stationary Point in the Hydrolysis Mechanisms involving TS2-A' and TS2-B' in Aqueous Solution at the CPCM-CCSD(T)/6-311+G(d,p)//PBE1W/CBSB7 level

| Species          | E <sub>sol</sub> (hartree) |
|------------------|----------------------------|
| Iminium Ion      | -173.286946                |
| H <sub>2</sub> O | -76.297988                 |
| CR2-A'           | -249.587396                |
| TS2-A'           | -249.442926                |
| CP2-A'           | -249.544889                |
| CR2-B'           | -325.893087                |
| TS2-B'           | -325.762853                |
| CP2-B'           | -325.846442                |
